# Supplementary material for: Estimating wearable motion sensor performance from personal biomechanical models and sensor data synthesis
Source: PubMed Central journal article supplement (PMC7351784; doi:10.1038/s41598-020-68225-6), 2020-07-10
Supplement: 41598_2020_68225_MOESM1_ESM.pdf [file 41598_2020_68225_MOESM1_ESM.pdf]

## Supplementary Material

Fig. 10 illustrates the stride duration estimation error distribution per athlete, considering all simulated sensors and all running speeds.

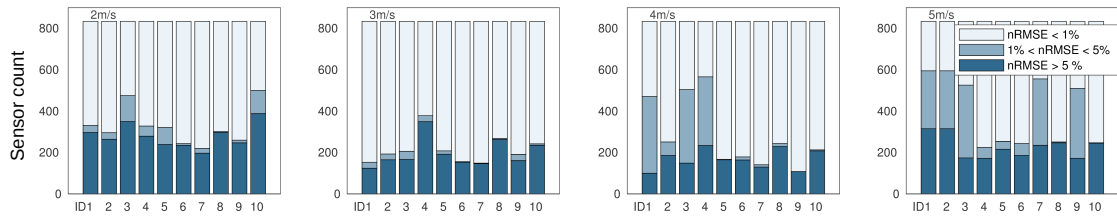

**Figure 10.** Distribution of nRMSE for all 834 simulated sensors per athlete ID for all running speeds in Case Study 1.

Fig. 11 shows the nRMSE maps for both, *simpl* and *cmplx* algorithms and a selected athlete. From individual athlete maps, it is clearly visible that the *cmplx* algorithm achieves wider map area with low nRMSE, i.e. at the ventral region..

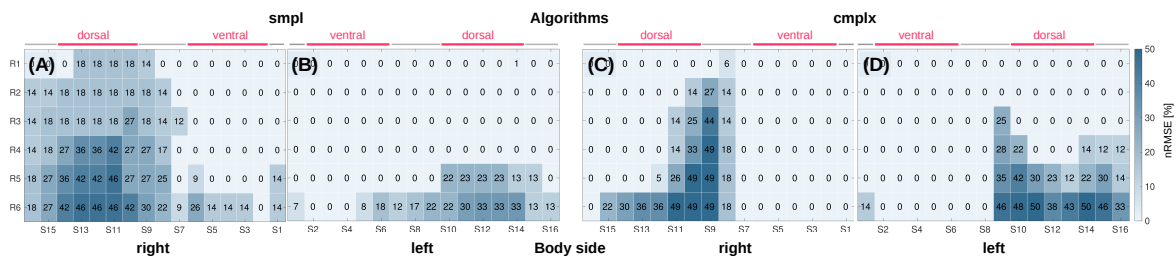

**Figure 11.** Algorithm comparison for stride duration estimation based on nRMSE maps for running athlete (ID10) running at 5 m/s. (A,B): *simpl* algorithm. (C,D): *cmplx* algorithm.

Fig. 12 shows the sensor count statistics with nRMSE below 10%. Sensor count differences are significant for the less-affected side between pre- and post-intervention ( $p = 0.035$ ). nRMSE across the study population showed significant differences between affected and less-affected body sides as well as for each side between pre- and post-intervention.

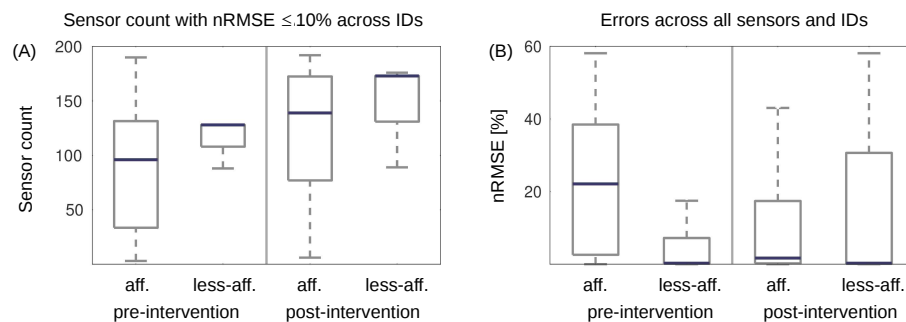

**Figure 12.** Statistics of the sensor count and errors in Case Study 2, including affected (aff.) and less-affected (less-aff.) body sides during pre- and post-intervention. (A): Sensor count across all patients with nRMSE  $\leq 10\%$ . (B): Distribution of nRMSE across all sensors.

An example video of the combined simulation of biomechanical and sensor models for a patient after stroke can be found here: [www.cdh.med.fau.de/2019/12/19/estimating-wearable-motion-sensor-performance](http://www.cdh.med.fau.de/2019/12/19/estimating-wearable-motion-sensor-performance)
